# Supplementary material
Source: PubMed Central journal article supplement (PMC3256914)
Supplement: supp_M111.317982_jbc.M111.317982-1.pdf [file supp_M111.317982_jbc.M111.317982-1.pdf]

## SUPPLEMENTAL DATA FOR

### **Biochemical characterization of indole prenyltransferases: Filling the last gap of prenylation positions by a 5-dimethylallyltryptophan synthase from *Aspergillus clavatus***

Xia Yu (于霞)<sup>1</sup>, Yan Liu (刘燕)<sup>1,2</sup>, Xiulan Xie (谢秀兰)<sup>3</sup>, Xiao-Dong Zheng (郑晓冬)<sup>2</sup>,  
Shu-Ming Li (李书明)<sup>1</sup>

<sup>1</sup>Institut für Pharmazeutische Biologie und Biotechnologie, Philipps-Universität Marburg,  
Deutschhausstrasse 17A, 35037 Marburg, Germany

<sup>2</sup> Department of Food Science and Nutrition, Zhejiang University, 310058 Hangzhou,  
Zhejiang, People's Republic of China

<sup>3</sup>Fachbereich Chemie, Philipps-Universität Marburg, Hans-Meerwein-Strasse, 35032  
Marburg, Germany

Correspondence to: Shu-Ming Li, Institut für Pharmazeutische Biologie und Biotechnologie,  
Philipps-Universität Marburg, Deutschhausstrasse 17A, 35037 Marburg, Germany, Tel:  
0049-6421-2822461, Fax: 0049-6421-2825365, email: [shuming.li@staff.uni-marburg.de](mailto:shuming.li@staff.uni-marburg.de)

**Table S1.** Enzyme activity of 5-DMATS towards aromatic compounds, which are not included in Table 1.

**Table S2.** Enzyme activity of 5-DMATS towards prenyl diphosphates.

**Table S3.** HR-ESI-MS data of enzyme products of 5-DMATS

**Table S4.**  $^1\text{H}$ - and  $^{13}\text{C}$ - NMR data of enzyme products obtained in  $\text{CD}_3\text{OD}$  or  $\text{DMSO-}d_6$ .

**Figure S1.** Analysis of purified His<sub>6</sub>-5-DMATS on SDS-PAGE.

**Figure S2.** Summary of the HMBC connectivities of enzyme products **1b**, **3b** and **7b**.

**Figure S3.1.**  $^1\text{H}$ -NMR spectrum of **1b** in  $\text{DMSO-}d_6$  (500 MHz)

**Figure S3.2.**  $^{13}\text{C}$ -NMR spectrum of **1b** in  $\text{DMSO-}d_6$  (500 MHz)

**Figure S3.3.** HSQC spectrum of **1b** in  $\text{DMSO-}d_6$  (500 MHz)

**Figure S3.4.** HMBC spectrum of **1b** in  $\text{DMSO-}d_6$  (500 MHz)

**Figure S3.5.**  $^1\text{H}$ -NMR spectrum of **1b** in  $\text{CD}_3\text{OD}$  (400 MHz)

**Figure S4.**  $^1\text{H}$ -NMR spectrum of **2b** in  $\text{CD}_3\text{OD}$  (400 MHz)

**Figure S5.1.**  $^1\text{H}$ -NMR spectrum of **3b** in  $\text{DMSO-}d_6$  (500 MHz)

**Figure S5.2.** HSQC spectrum of **3b** in  $\text{DMSO-}d_6$  (500 MHz)

**Figure S5.3.** HMBC spectrum of **3b** in  $\text{DMSO-}d_6$  (500 MHz)

**Figure S6.**  $^1\text{H}$ -NMR spectrum of **4b** in  $\text{CD}_3\text{OD}$  (500 MHz)

**Figure S7.**  $^1\text{H}$ -NMR spectrum of **5b** in  $\text{CD}_3\text{OD}$  (500 MHz)

**Figure S8.**  $^1\text{H}$ -NMR spectrum of **6b** and **6c** in  $\text{DMSO-}d_6$  (500 MHz)

**Figure S9.1.**  $^1\text{H}$ -NMR spectrum of **7b** in  $\text{CD}_3\text{OD}$  (500 MHz)

**Figure S9.2.**  $^{13}\text{C}$ -NMR spectrum of **7b** in  $\text{CD}_3\text{OD}$  (500 MHz)

**Figure S9.3.** HSQC spectrum of **7b** in  $\text{CD}_3\text{OD}$  (500 MHz)

**Figure S9.4.** HMBC spectrum of **7b** in  $\text{CD}_3\text{OD}$  (500 MHz)

**Figure S10.**  $^1\text{H}$ -NMR spectrum of **8b** in  $\text{CD}_3\text{OD}$  (500 MHz)

**Figure S11.**  $^1\text{H}$ -NMR spectrum of **9b** in  $\text{CD}_3\text{OD}$  (400 MHz)

**Figure S12.**  $^1\text{H}$ -NMR spectrum of **10b** in  $\text{CD}_3\text{OD}$  (500 MHz)

**Figure S13.**  $^1\text{H}$ -NMR spectrum of **11b** in  $\text{CD}_3\text{OD}$  (500 MHz)

**Figure S14.**  $^1\text{H}$ -NMR spectrum of **12b** in  $\text{CD}_3\text{OD}$  (500 MHz)

**Table S1.** Enzyme activity of 5-DMATS towards aromatic compounds, which are not included in Table 1.

| Name                   | Structure                                                                           | Product yield (%) |
|------------------------|-------------------------------------------------------------------------------------|-------------------|
| 5-methyl-DL-tryptophan | 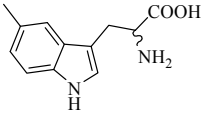   | 1.7               |
| 5-bromo-DL-tryptophan  |    | < 0.5             |
| 5-fluoro-L-tryptophan  |    | 7.4               |
| indole-3-butyric acid  |    | 20.2              |
| indole-3-acetic acid   |    | 1.8               |
| tryptamine             |   | 6.1               |
| cyclo-L-Trp-L-Ala      |  | 1.9               |
| cyclo-L-Trp-L-Leu      |  | 6.4               |
| cyclo-L-Trp-L-Phe      |  | 2.2               |
| cyclo-L-Trp-L-Pro      |  | 0.9               |
| cyclo-L-Trp-L-Trp      |  | 9.0               |

The reaction mixtures containing aromatic compounds and DMAPP were incubated with 1  $\mu$ M protein for 7 h.

**Table S2.** Enzyme activity of 5-DMATS towards prenyl diphosphates

| Name  | Structure                                                                         | Product yield (%)                     |                                    |                                     |
|-------|-----------------------------------------------------------------------------------|---------------------------------------|------------------------------------|-------------------------------------|
|       |                                                                                   | 1h incubation<br>0.40 $\mu$ M 5-DMATS | 7h incubation<br>1 $\mu$ M 5-DMATS | 24h incubation<br>1 $\mu$ M 5-DMATS |
| DMAPP | 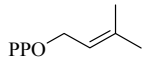 | 95.4                                  | 100                                | 100                                 |
| GPP   |  | < 0.5                                 | < 0.5                              | < 0.5                               |
| FPP   |  | < 0.5                                 | < 0.5                              | < 0.5                               |

L-tryptophan was used as aromatic substrate.

**Table S3.** HR-ESI-MS data of enzyme products of 5-DMATS

| Comp.            | Chemical formula                                               | HR-ESI-MS data               |          |                 |
|------------------|----------------------------------------------------------------|------------------------------|----------|-----------------|
|                  |                                                                | Calculated                   | Measured | Deviation (ppm) |
| <b>1b</b>        | C <sub>16</sub> H <sub>20</sub> N <sub>2</sub> O <sub>2</sub>  | 273.1603 [M+H] <sup>+</sup>  | 273.1604 | -0.3            |
| <b>2b</b>        | C <sub>17</sub> H <sub>22</sub> N <sub>2</sub> O <sub>2</sub>  | 287.1760 [M+H] <sup>+</sup>  | 287.1746 | 4.5             |
| <b>3b</b>        | C <sub>17</sub> H <sub>22</sub> N <sub>2</sub> O <sub>2</sub>  | 287.1760 [M+H] <sup>+</sup>  | 287.1753 | 2.4             |
| <b>4b</b>        | C <sub>17</sub> H <sub>22</sub> N <sub>2</sub> O <sub>2</sub>  | 287.1760 [M+H] <sup>+</sup>  | 287.1791 | -11.0           |
| <b>5b</b>        | C <sub>16</sub> H <sub>19</sub> FN <sub>2</sub> O <sub>2</sub> | 291.1509 [M+H] <sup>+</sup>  | 291.1473 | 12.4            |
| <b>6b and 6c</b> | C <sub>17</sub> H <sub>22</sub> N <sub>2</sub> O <sub>2</sub>  | 287.1760 [M+H] <sup>+</sup>  | 287.1725 | 11.9            |
| <b>7b</b>        | C <sub>17</sub> H <sub>22</sub> N <sub>2</sub> O <sub>2</sub>  | 287.1760 [M+H] <sup>+</sup>  | 287.1750 | 3.3             |
| <b>8b</b>        | C <sub>18</sub> H <sub>22</sub> N <sub>2</sub> O <sub>3</sub>  | 337.1528 [M+Na] <sup>+</sup> | 337.1499 | 8.7             |
| <b>9b</b>        | C <sub>17</sub> H <sub>22</sub> N <sub>2</sub> O <sub>2</sub>  | 287.1760 [M+H] <sup>+</sup>  | 287.1744 | 5.4             |
| <b>10b</b>       | C <sub>16</sub> H <sub>19</sub> NO <sub>3</sub>                | 296.1263 [M+Na] <sup>+</sup> | 296.1245 | 5.9             |
| <b>11b</b>       | C <sub>16</sub> H <sub>19</sub> NO <sub>2</sub>                | 280.1313 [M+Na] <sup>+</sup> | 280.1346 | -11.6           |
| <b>12b</b>       | C <sub>16</sub> H <sub>17</sub> NO <sub>2</sub>                | 278.1157 [M+Na] <sup>+</sup> | 278.1153 | 1.4             |

**Table S4.**  $^1\text{H}$ - and  $^{13}\text{C}$ - NMR data of enzyme products obtained in  $\text{CD}_3\text{OD}$  or  $\text{DMSO}-d_6$ .

| Compd | 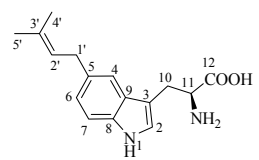 |                     |  |                                   |  |                      |  |                                   |  |                                   |  |  |  |  |
|-------|-----------------------------------------------------------------------------------|---------------------|-----------------------------------------------------------------------------------|-----------------------------------|------------------------------------------------------------------------------------|----------------------|-------------------------------------------------------------------------------------|-----------------------------------|-------------------------------------------------------------------------------------|-----------------------------------|-------------------------------------------------------------------------------------|--|-------------------------------------------------------------------------------------|--|
|       | Pos.                                                                              | $\delta_{\text{C}}$ | $\delta_{\text{H}}$ , multi., $J$                                                 | $\delta_{\text{H}}$ , multi., $J$ | $\delta_{\text{H}}$ , multi., $J$                                                  | $\delta_{\text{C}}$  | $\delta_{\text{H}}$ , multi., $J$                                                   | $\delta_{\text{H}}$ , multi., $J$ | $\delta_{\text{H}}$ , multi., $J$                                                   | $\delta_{\text{H}}$ , multi., $J$ | $\delta_{\text{H}}$ , multi., $J$                                                   |  |                                                                                     |  |
|       |                                                                                   |                     |                                                                                   |                                   |                                                                                    |                      |                                                                                     |                                   |                                                                                     |                                   |                                                                                     |  |                                                                                     |  |
| 2     | 124.1                                                                             | 7.18, s             | 7.15, s                                                                           | 7.05, s                           | 124.5                                                                              | 7.11, s              | 7.14, s                                                                             | 7.14, s                           | 7.14, s                                                                             | 7.14, br. s                       |                                                                                     |  |                                                                                     |  |
| 3     | 109.3                                                                             | -                   | -                                                                                 | -                                 | §                                                                                  | -                    | -                                                                                   | -                                 | -                                                                                   | -                                 |                                                                                     |  |                                                                                     |  |
| 4     | 117.2                                                                             | 7.32, br. s         | 7.49, d, 1.6                                                                      | 7.49, br. s                       | 126.5                                                                              | -                    | 7.44, s                                                                             | 7.49, d, 7.3                      | 7.14, br. s                                                                         |                                   |                                                                                     |  |                                                                                     |  |
| 5     | 131.0                                                                             | -                   | -                                                                                 | -                                 | 128.9                                                                              | -                    | -                                                                                   | -                                 | -                                                                                   | -                                 |                                                                                     |  |                                                                                     |  |
| 6     | 121.8                                                                             | 6.88, br. d, 8.3    | 6.95, dd, 8.4, 1.6                                                                | 7.02, dd, 8.4, 1.5                | 123.0                                                                              | 6.85, d, 8.2         | -                                                                                   | -                                 | 6.69, br. s                                                                         |                                   |                                                                                     |  |                                                                                     |  |
| 7     | 111.2                                                                             | 7.25, d, 8.3        | 7.27, d, 8.4                                                                      | 7.25, d, 8.4                      | 108.8                                                                              | 7.08, d, 8.2         | 7.08, s                                                                             | 7.02, d, 10.8                     | -                                                                                   |                                   |                                                                                     |  |                                                                                     |  |
| 8     | 134.9                                                                             | -                   | -                                                                                 | -                                 | 135.6                                                                              | -                    | -                                                                                   | -                                 | -                                                                                   |                                   |                                                                                     |  |                                                                                     |  |
| 9     | 127.4                                                                             | -                   | -                                                                                 | -                                 | 125.5                                                                              | -                    | -                                                                                   | -                                 | -                                                                                   |                                   |                                                                                     |  |                                                                                     |  |
| 10    | 27.2                                                                              | 3.30, dd, 15.1, 3.6 | 3.51, dd, 15.3, 4.0                                                               | 3.48, dd, 15.3, 4.0               | 29.2                                                                               | 3.63, d, 15.2        | 3.50, dd, 15.2, 3.7                                                                 | 3.48, dd, 15.2, 3.8               | #                                                                                   |                                   |                                                                                     |  |                                                                                     |  |
| 10    |                                                                                   | 2.90, dd, 15.1, 9.3 | 3.10, dd, 15.2, 9.8                                                               | 3.09, dd, 15.3, 9.5               |                                                                                    | 2.89, dd, 15.4, 10.6 | 3.08, dd, 15.2, 9.8                                                                 | 3.09, dd, 15.3, 9.6               | 2.87, dd, 14.9, 9.5                                                                 |                                   |                                                                                     |  |                                                                                     |  |
| 11    | 54.8                                                                              | 3.44, dd, 9.3, 3.6  | 3.86, dd, 9.8, 4.0                                                                | 3.83, dd, 9.5, 4.0                | §                                                                                  | #                    | 3.85, dd, 9.8, 3.7                                                                  | 3.83, dd, 9.6, 3.8                | #                                                                                   |                                   |                                                                                     |  |                                                                                     |  |
| 12    | 170.2                                                                             | -                   | -                                                                                 | -                                 | §                                                                                  | -                    | -                                                                                   | -                                 | -                                                                                   |                                   |                                                                                     |  |                                                                                     |  |
| 13    | -                                                                                 | -                   | -                                                                                 | 3.75, s                           | 14.9                                                                               | 2.55, s              | 2.34, s                                                                             | -                                 | 2.40, s                                                                             |                                   |                                                                                     |  |                                                                                     |  |
| 14    | -                                                                                 | -                   | -                                                                                 | -                                 | -                                                                                  | -                    | -                                                                                   | -                                 | -                                                                                   |                                   |                                                                                     |  |                                                                                     |  |
| 1'    | 34.1                                                                              | 3.36, d, 7.4        | 3.43, d, 7.4                                                                      | 3.44, d, 7.3                      | 31.4                                                                               | 3.34                 | 3.41, d, 6.8                                                                        | 3.41, d, 7.1                      | #                                                                                   |                                   |                                                                                     |  |                                                                                     |  |
| 2'    | 124.9                                                                             | 5.33, t, 7.4        | 5.37, m                                                                           | 5.37, m                           | 124.3                                                                              | 5.17, t, 7.1         | 5.24, m                                                                             | 5.33, t, 7.1                      | 5.32, m                                                                             |                                   |                                                                                     |  |                                                                                     |  |
| 3'    | 130.4                                                                             | -                   | -                                                                                 | -                                 | 129.5                                                                              | -                    | -                                                                                   | -                                 | -                                                                                   |                                   |                                                                                     |  |                                                                                     |  |
| 4'    | 17.7                                                                              | 1.72, s             | 1.76, s                                                                           | 1.76, s                           | 17.3                                                                               | 1.73, s              | 1.77, s                                                                             | 1.76, s                           | 1.71, s                                                                             |                                   |                                                                                     |  |                                                                                     |  |
| 5'    | 25.5                                                                              | 1.70, s             | 1.74, s                                                                           | 1.74, s                           | 25.1                                                                               | 1.67, s              | 1.72, s                                                                             | 1.72, s                           | 1.69, s                                                                             |                                   |                                                                                     |  |                                                                                     |  |

Chemical shifts ( $\delta$ ) were given in ppm and coupling constants ( $J$ ) in Hz. #: overlapping signals with those of solvents; §: due to low amount, the signals were not observed.

**Table S4** (continued)

| Compd | 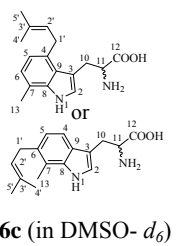 |  |  |  |  |  |  |                                   |
|-------|-----------------------------------------------------------------------------------|-----------------------------------------------------------------------------------|-----------------------------------------------------------------------------------|------------------------------------------------------------------------------------|-------------------------------------------------------------------------------------|-------------------------------------------------------------------------------------|-------------------------------------------------------------------------------------|-----------------------------------|
| Pos.  | $\delta_{\text{H}}$ , multi., $J$                                                 | $\delta_{\text{C}}$                                                               | $\delta_{\text{H}}$ , multi., $J$                                                 | $\delta_{\text{H}}$ , multi., $J$                                                  | $\delta_{\text{H}}$ , multi., $J$                                                   | $\delta_{\text{H}}$ , multi., $J$                                                   | $\delta_{\text{H}}$ , multi., $J$                                                   | $\delta_{\text{H}}$ , multi., $J$ |
| 2     | 7.12, d, 2.2                                                                      | 125.3                                                                             | 7.18, s                                                                           | 7.05, s                                                                            | 7.13, s                                                                             | 7.09, s                                                                             | 7.00, s                                                                             | 7.60, s                           |
| 3     | -                                                                                 | 108.6                                                                             | -                                                                                 | -                                                                                  | -                                                                                   | -                                                                                   | -                                                                                   | -                                 |
| 4     | 7.29, d, 8.1                                                                      | 118.3                                                                             | 7.47, br. s                                                                       | 7.35, br. s                                                                        | 7.36, d, 1.6                                                                        | 7.45, br. s                                                                         | 7.33, br. s                                                                         | 7.61, br. s                       |
| 5     | 6.80, d, 8.1                                                                      | 133.8                                                                             | -                                                                                 | -                                                                                  | -                                                                                   | -                                                                                   | -                                                                                   | -                                 |
| 6     |                                                                                   | 123.8                                                                             | 6.95, dd, 8.4, 1.5                                                                | 6.88, dd, 8.3, 1.5                                                                 | 6.95, dd, 8.4, 1.6                                                                  | 6.88, dd, 8.3, 1.5                                                                  | 6.89, dd, 8.3, 1.5                                                                  | 7.05, dd, 8.3, 1.5                |
| 7     | -                                                                                 | 112.3                                                                             | 7.26, d, 8.4                                                                      | 7.19, d, 8.3                                                                       | 7.27, d, 8.4                                                                        | 7.19, d, 8.3                                                                        | 7.20, d, 8.3                                                                        | 7.33, d, 8.3                      |
| 8     | -                                                                                 | 136.9                                                                             | -                                                                                 | -                                                                                  | -                                                                                   | -                                                                                   | -                                                                                   | -                                 |
| 9     | -                                                                                 | 128.7                                                                             | -                                                                                 | -                                                                                  | -                                                                                   | -                                                                                   | -                                                                                   | -                                 |
| 10    | #                                                                                 | 27.6                                                                              | 3.46, dd, 15.5, 4.6                                                               | 3.34, dd, 14.6, 4.8                                                                | 2.54, dd, 16.8, 3.9                                                                 | 3.26, dd, 14.8, 3.4                                                                 | 2.57, m                                                                             | 6.34, d, 15.9                     |
| 10    | 2.90, dd, 14.3, 9.3                                                               |                                                                                   | 3.23, dd, 15.5, 8.2                                                               | 3.13, dd, 14.6, 6.7                                                                | 2.35, dd, 16.8, 9.2                                                                 | 2.92, dd, 14.8, 8.2                                                                 | -                                                                                   | -                                 |
| 11    | #                                                                                 | 65.4                                                                              | 3.77, dd, 8.2, 4.6                                                                | 4.58, dd, 6.7, 4.8                                                                 | 3.66, m                                                                             | 4.21, dd, 8.2, 3.4                                                                  | 3.01, m                                                                             | 7.90, d, 15.9                     |
| 12    | -                                                                                 | 173.4                                                                             | -                                                                                 | -                                                                                  | 3.05, d, 7.2                                                                        | -                                                                                   | -                                                                                   | -                                 |
| 13    | 2.36, s                                                                           | 33.1                                                                              | 2.56, s                                                                           | -                                                                                  | -                                                                                   | -                                                                                   | -                                                                                   | -                                 |
| 14    | -                                                                                 | -                                                                                 | -                                                                                 | 1.86, s                                                                            | -                                                                                   | -                                                                                   | -                                                                                   | -                                 |
| 1'    | #                                                                                 | 35.6                                                                              | 3.43, d, 7.3                                                                      | 3.40, d, 7.3                                                                       | 3.42, d, 6.9                                                                        | 3.40, d, 7.3                                                                        | 3.40, d, 7.2                                                                        | 3.47, d, 7.3                      |
| 2'    | 5.18, m                                                                           | 126.0                                                                             | 5.37, m                                                                           | 5.37, m                                                                            | 5.37, m                                                                             | 5.38, m                                                                             | 5.37, m                                                                             | 5.40, m                           |
| 3'    | -                                                                                 | 132.0                                                                             | -                                                                                 | -                                                                                  | -                                                                                   | -                                                                                   | -                                                                                   | -                                 |
| 4'    | 1.72, s                                                                           | 17.9                                                                              | 1.76, s                                                                           | 1.76, s                                                                            | 1.76, s                                                                             | 1.76, s                                                                             | 1.76, s                                                                             | 1.78, s                           |
| 5'    | 1.67, s                                                                           | 25.9                                                                              | 1.74, s                                                                           | 1.74, s                                                                            | 1.74, s                                                                             | 1.74, s                                                                             | 1.75, s                                                                             | 1.77, s                           |

#: overlapping signals with those of solvents; §: due to low amount, the signals were not observed.

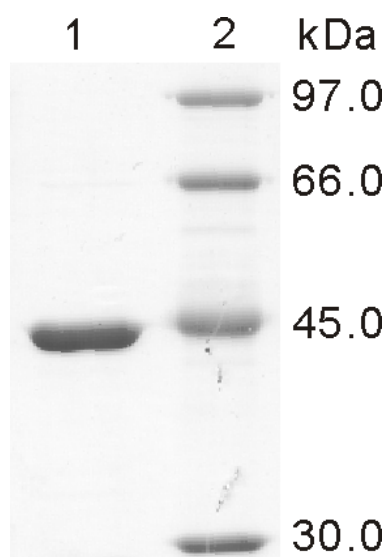

**Figure S1.** Analysis of purified His<sub>6</sub>-5-DMATS on SDS-PAGE. Lane 1: purified His<sub>6</sub>-5-DMATS; 2: molecular mass standard.

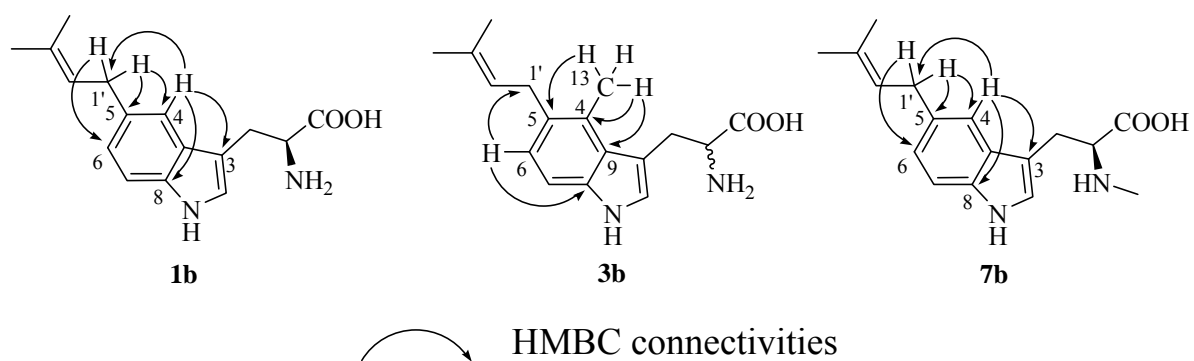

**Figure S2.** Summary of the HMBC connectivities of enzyme products **1b**, **3b** and **7b**.

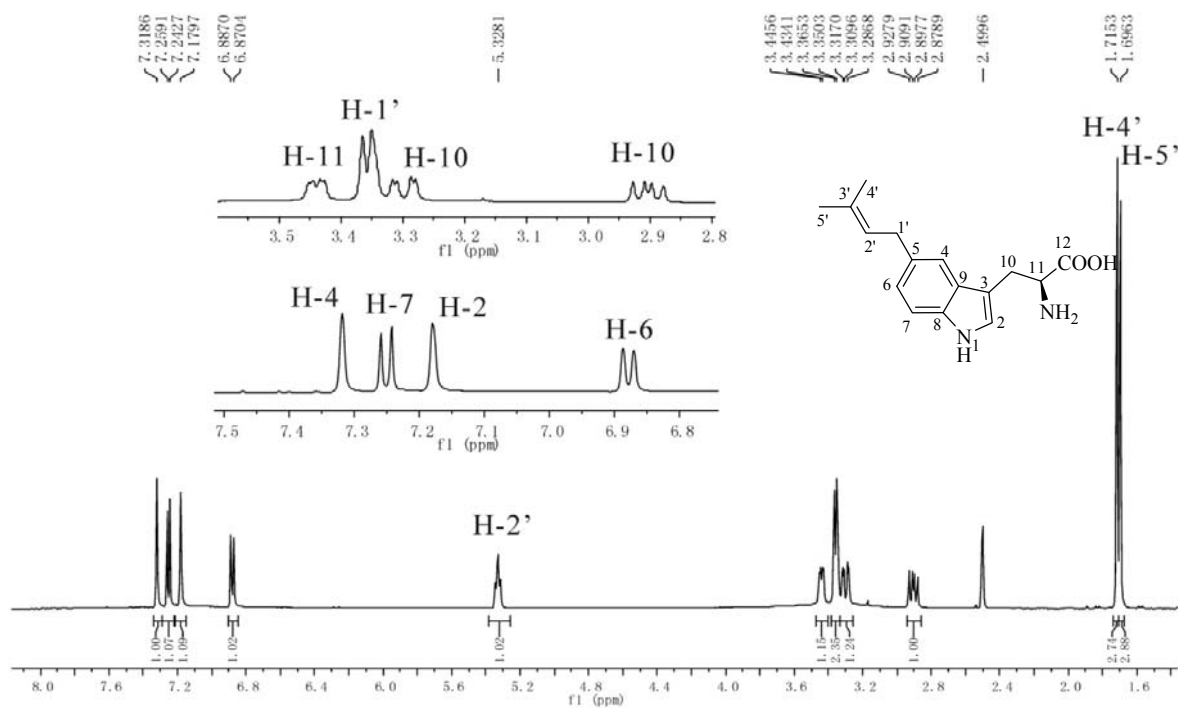

**Figure S3.1.**  $^1\text{H-NMR}$  spectrum of **1b** in  $\text{DMSO-}d_6$  (500 MHz)

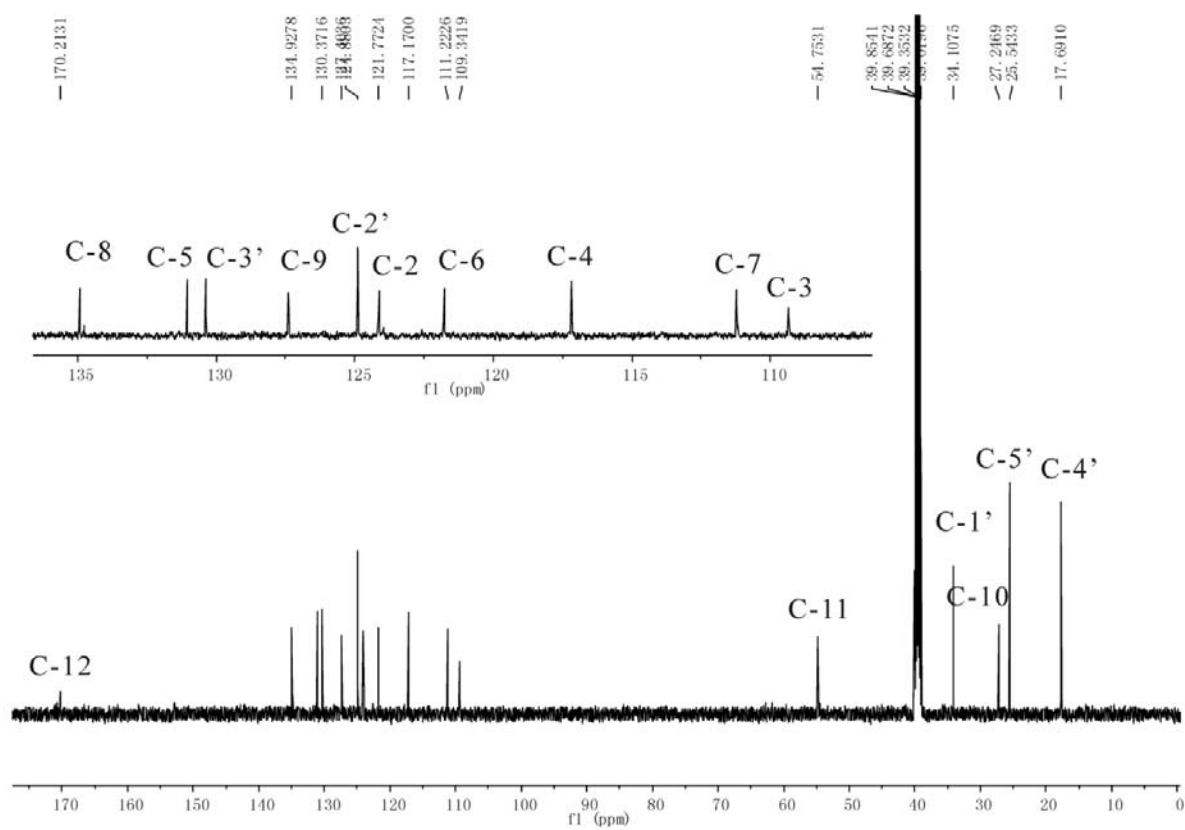

**Figure S3.2.**  $^{13}\text{C-NMR}$  spectrum of **1b** in  $\text{DMSO-}d_6$  (500 MHz)



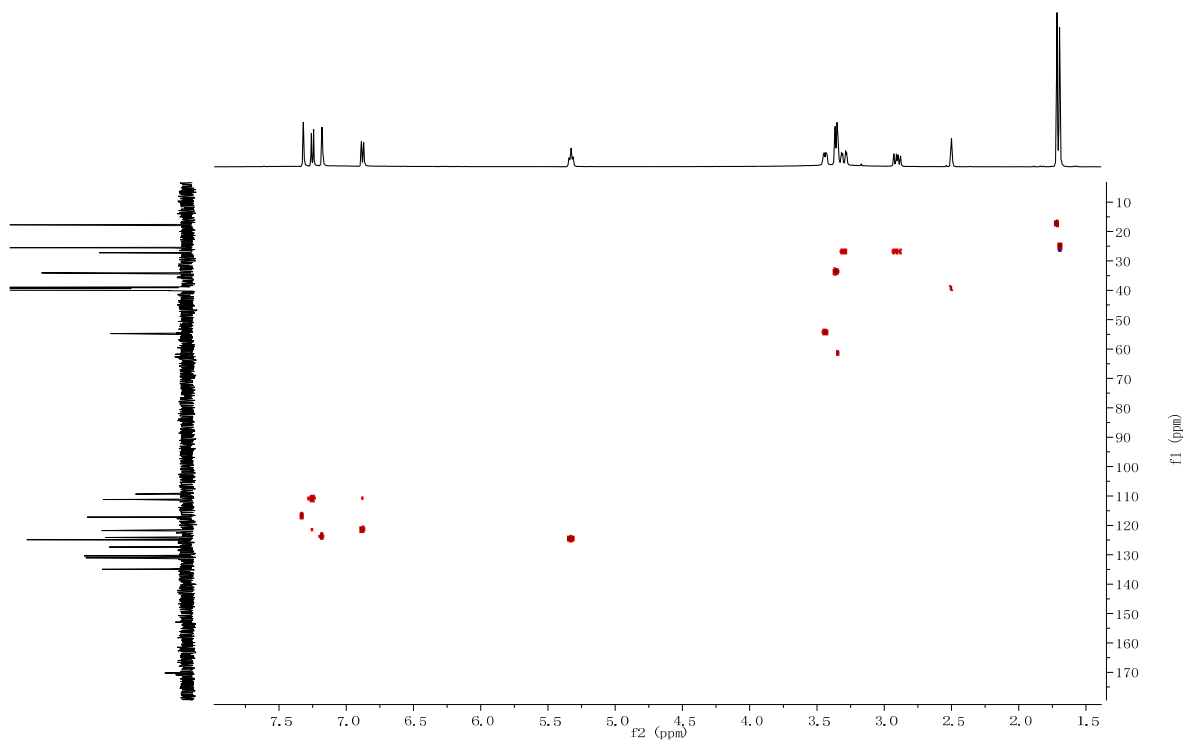

**Figure S3.3.** HSQC spectrum of **1b** in DMSO- $d_6$  (500 MHz)

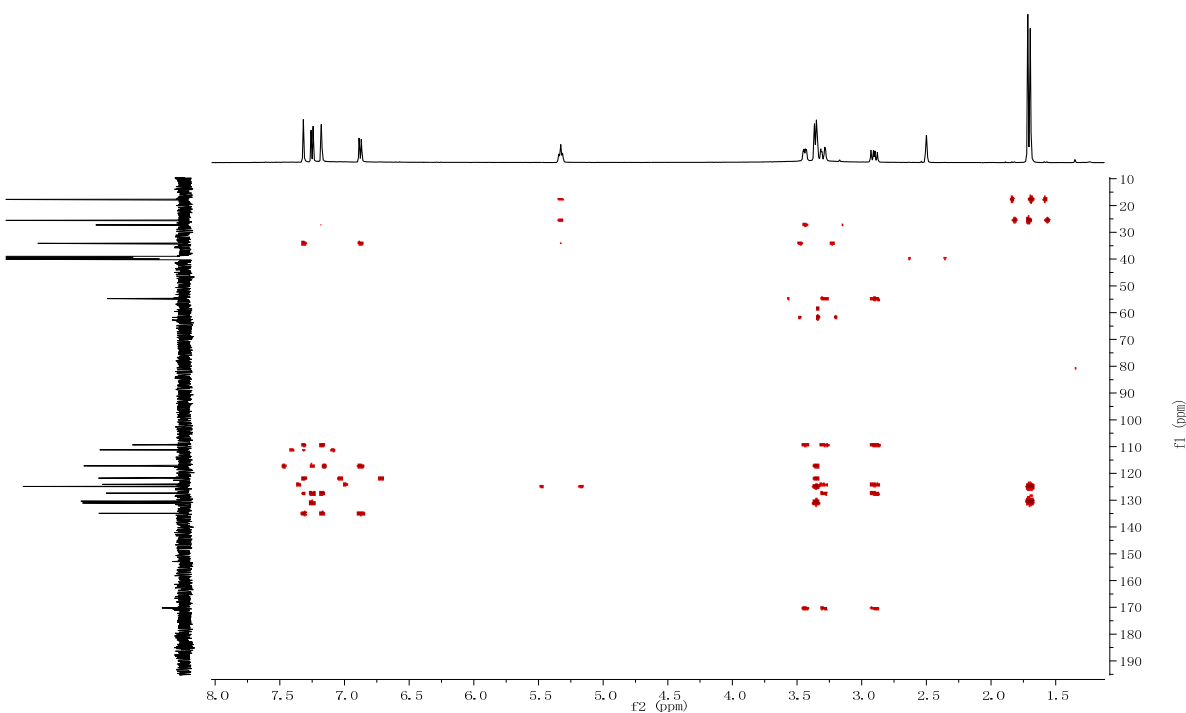

**Figure S3.4.** HMBC spectrum of **1b** in DMSO- $d_6$  (500 MHz)

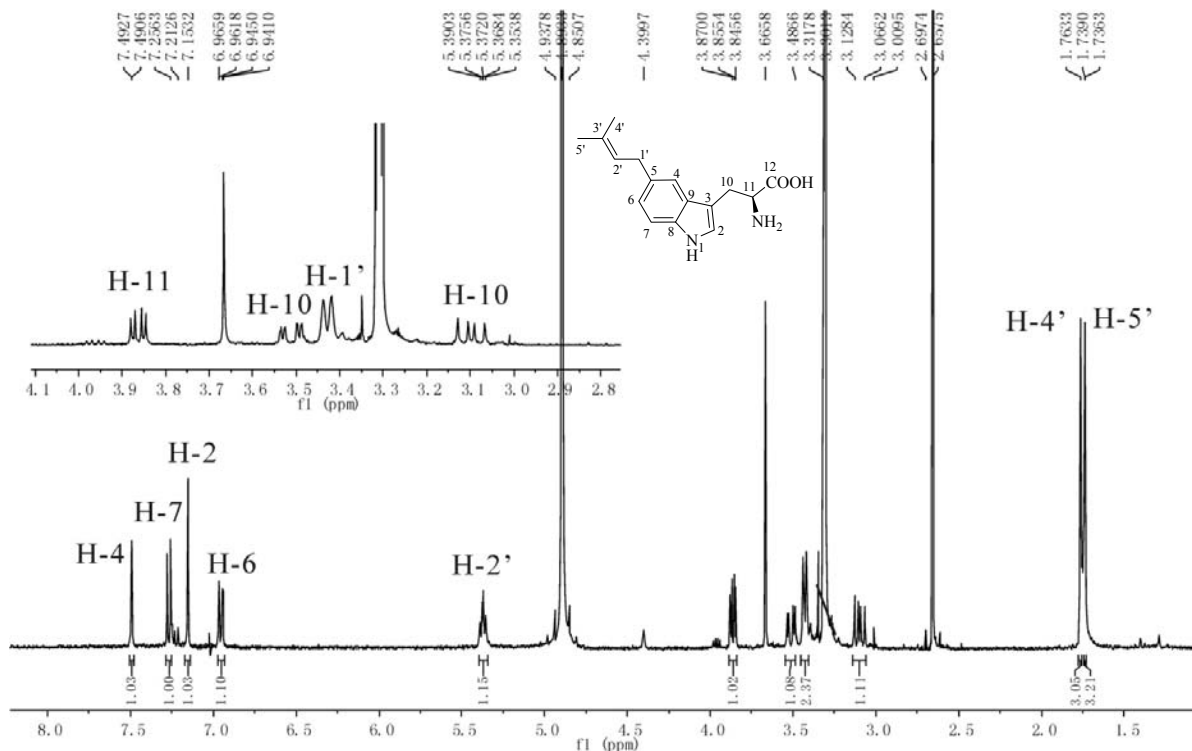

**Figure S3.5.** <sup>1</sup>H-NMR spectrum of **1b** in CD<sub>3</sub>OD (400 MHz)

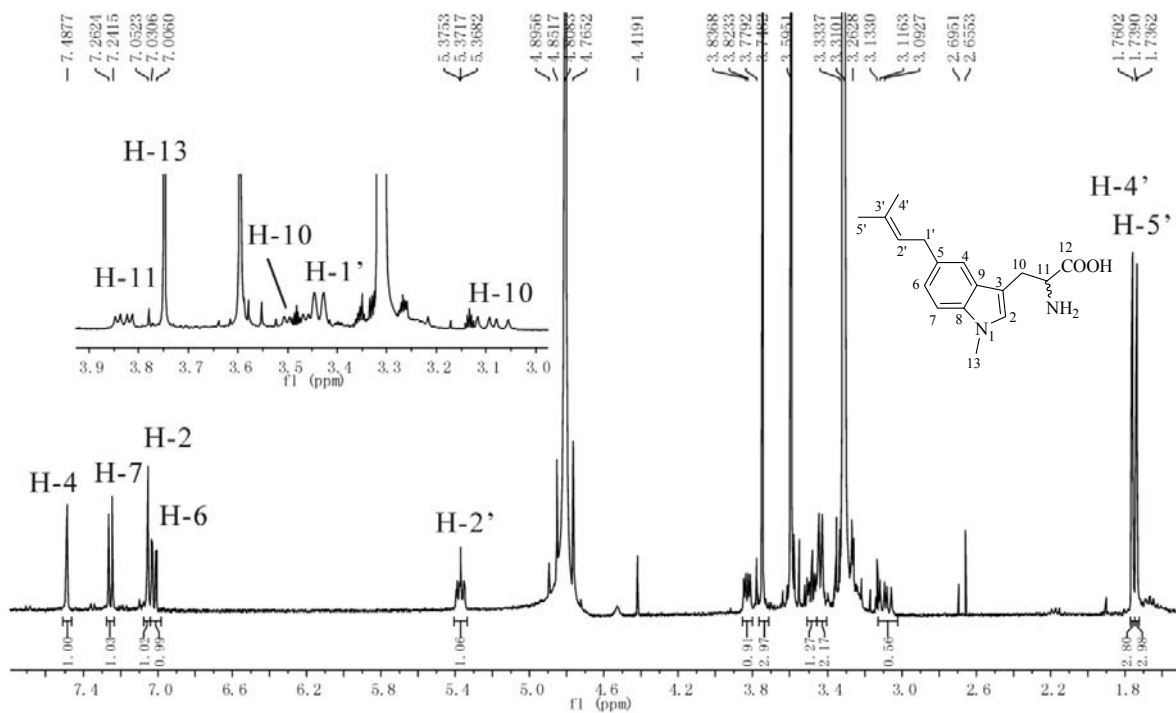

**Figure S4.** <sup>1</sup>H-NMR spectrum of **2b** in CD<sub>3</sub>OD (400 MHz)

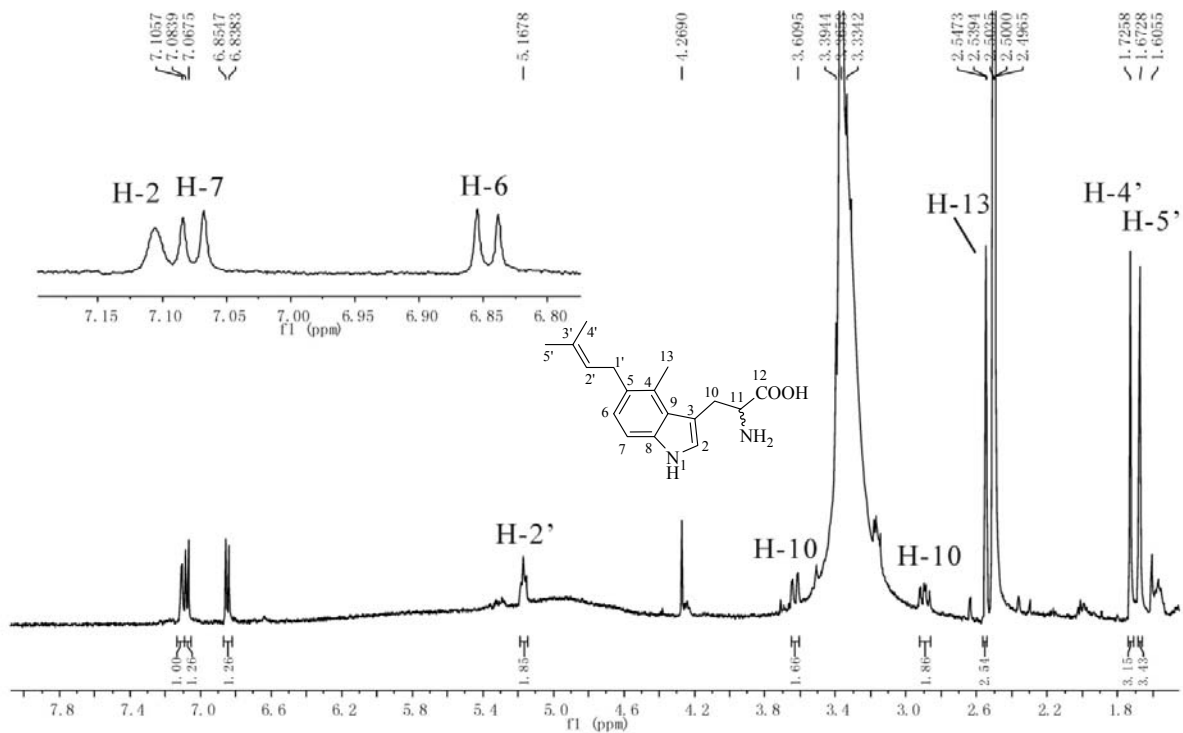

**Figure S5.1.**  $^1\text{H-NMR}$  spectrum of **3b** in  $\text{DMSO-}d_6$  (500 MHz)

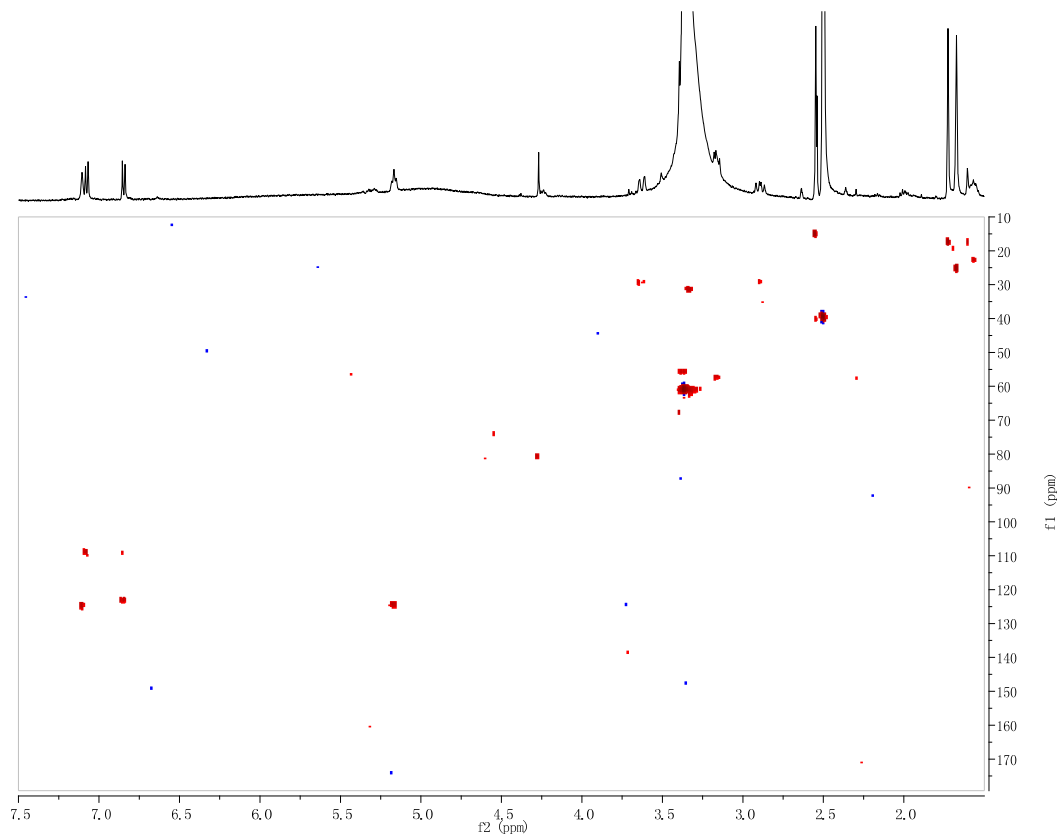

**Figure S5.2.** HSQC spectrum of **3b** in  $\text{DMSO-}d_6$  (500 MHz)

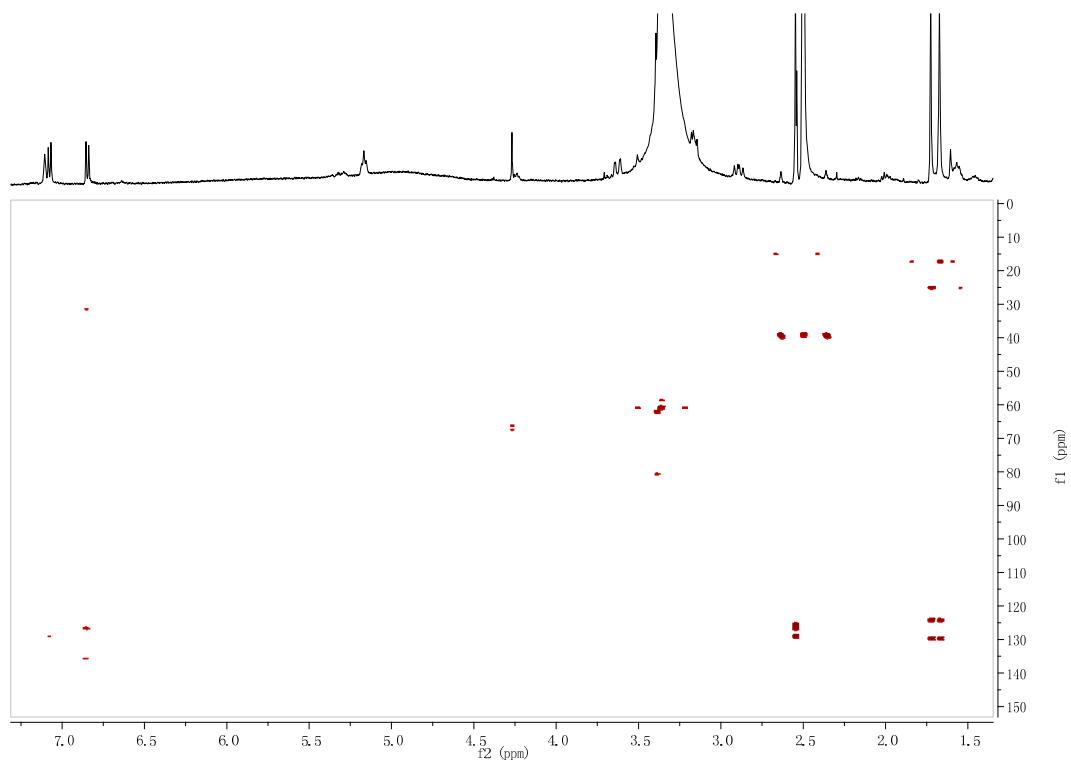

**Figure S5.3.** HMBC spectrum of **3b** in DMSO-*d*<sub>6</sub> (500 MHz)

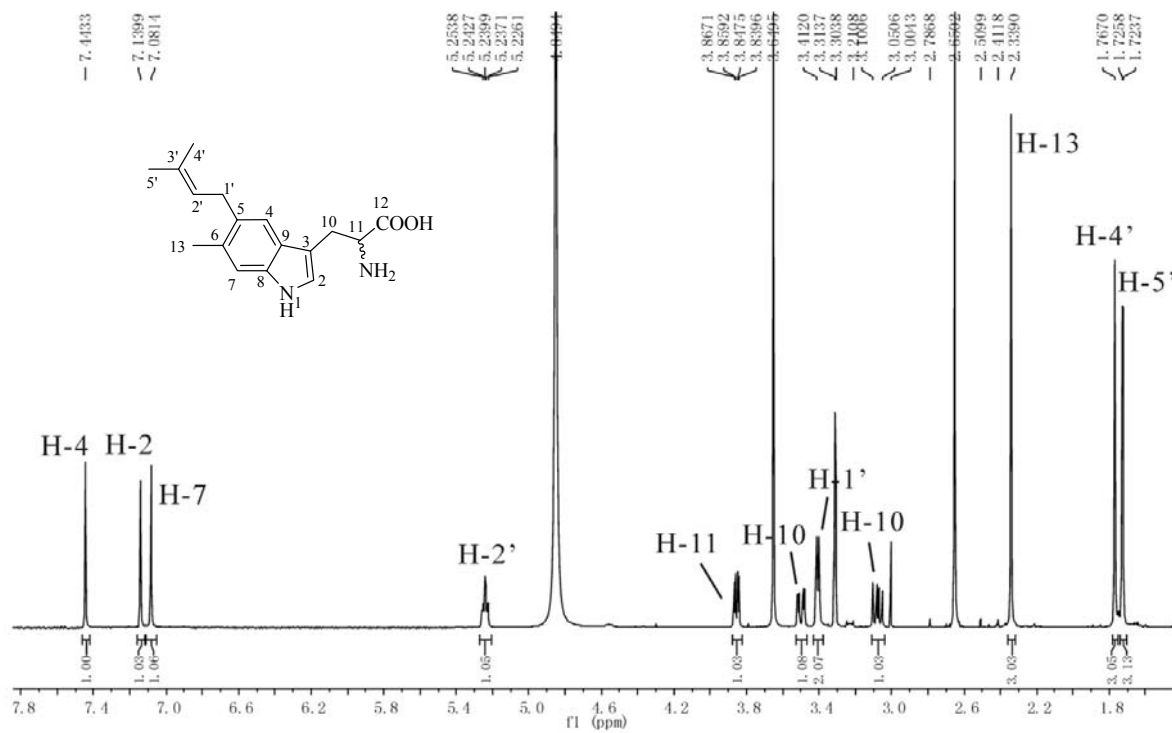

**Figure S6.** <sup>1</sup>H-NMR spectrum of **4b** in CD<sub>3</sub>OD (500 MHz)

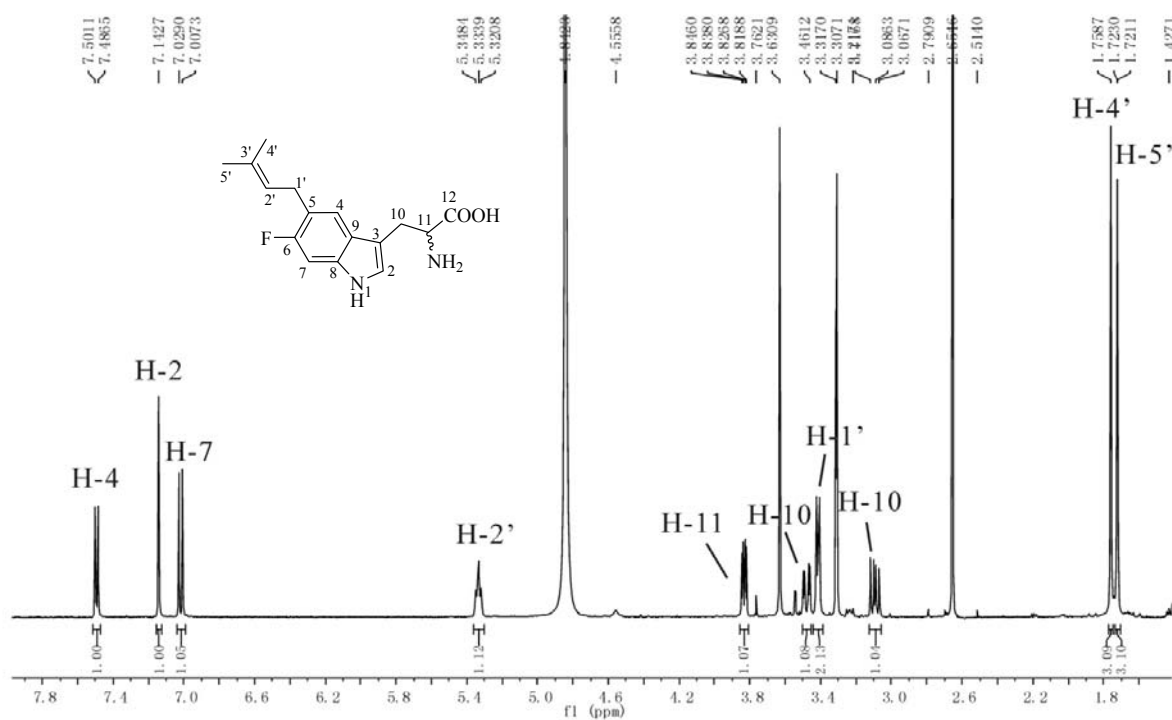

**Figure S7.** <sup>1</sup>H-NMR spectrum of **5b** in CD<sub>3</sub>OD (500 MHz)

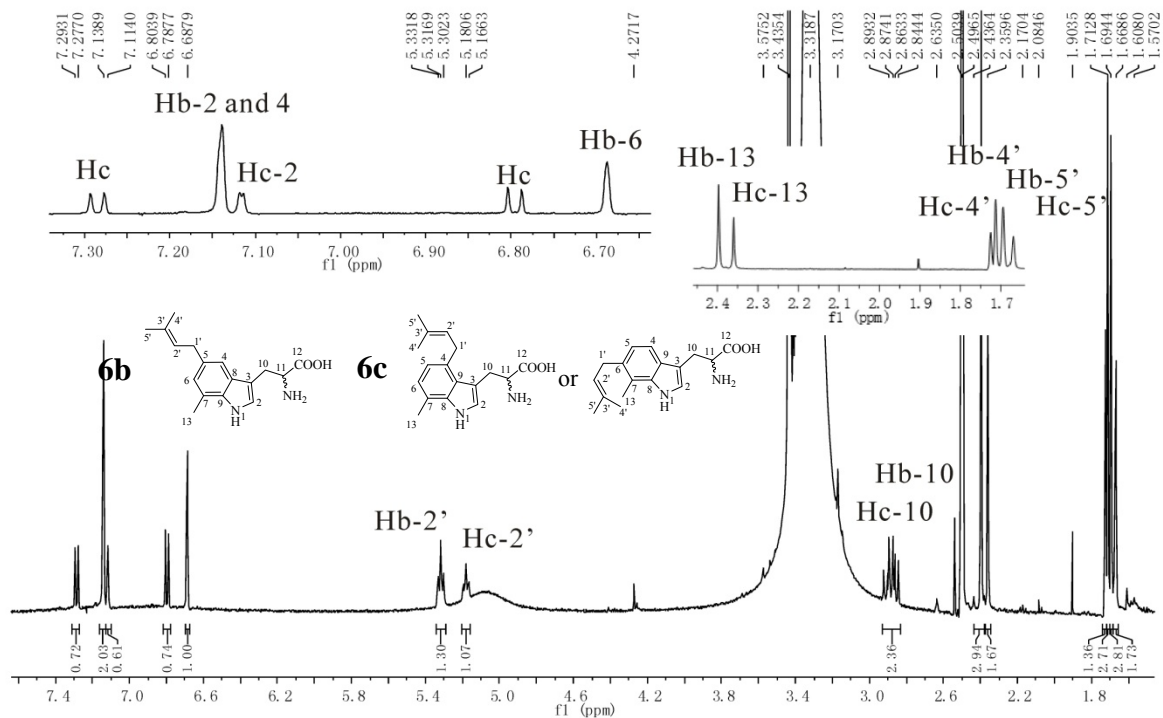

**Figure S8.** <sup>1</sup>H-NMR spectrum of **6b** and **6c** in DMSO-*d*<sub>6</sub> (500 MHz). The protons of **6b** and **6c** were labeled with Hb and Hc, respectively.

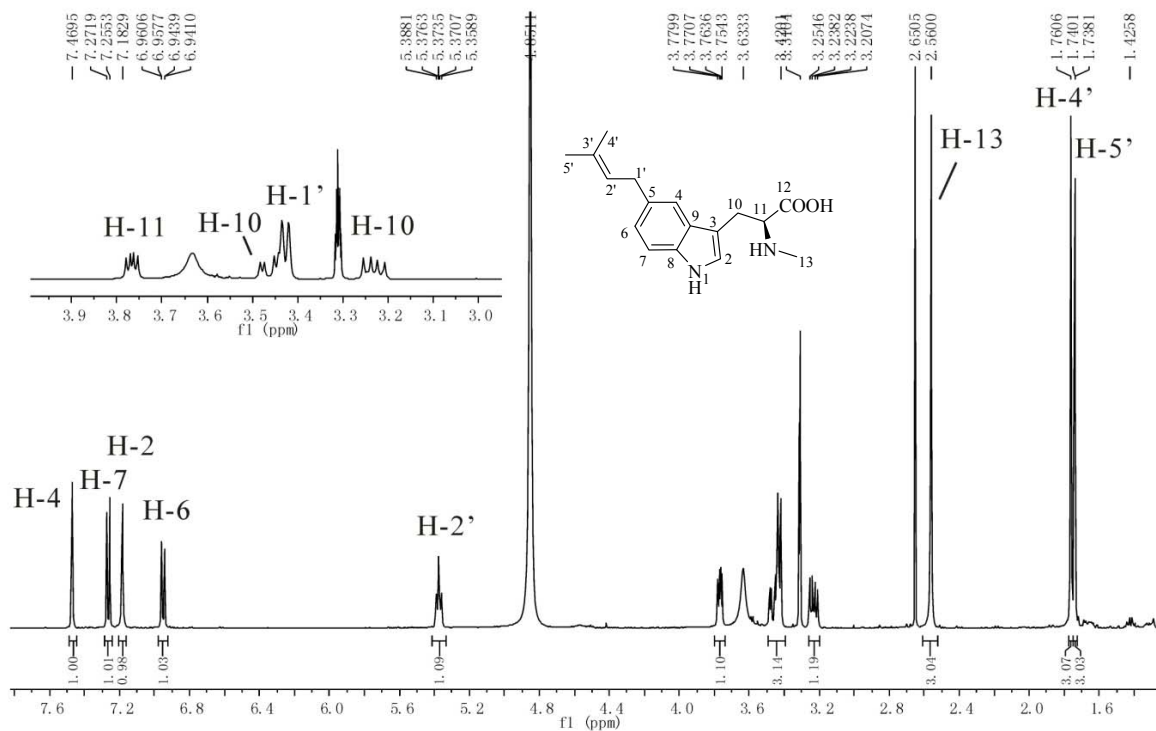

**Figure S9.1.**  $^1\text{H-NMR}$  spectrum of **7b** in  $\text{CD}_3\text{OD}$  (500 MHz)

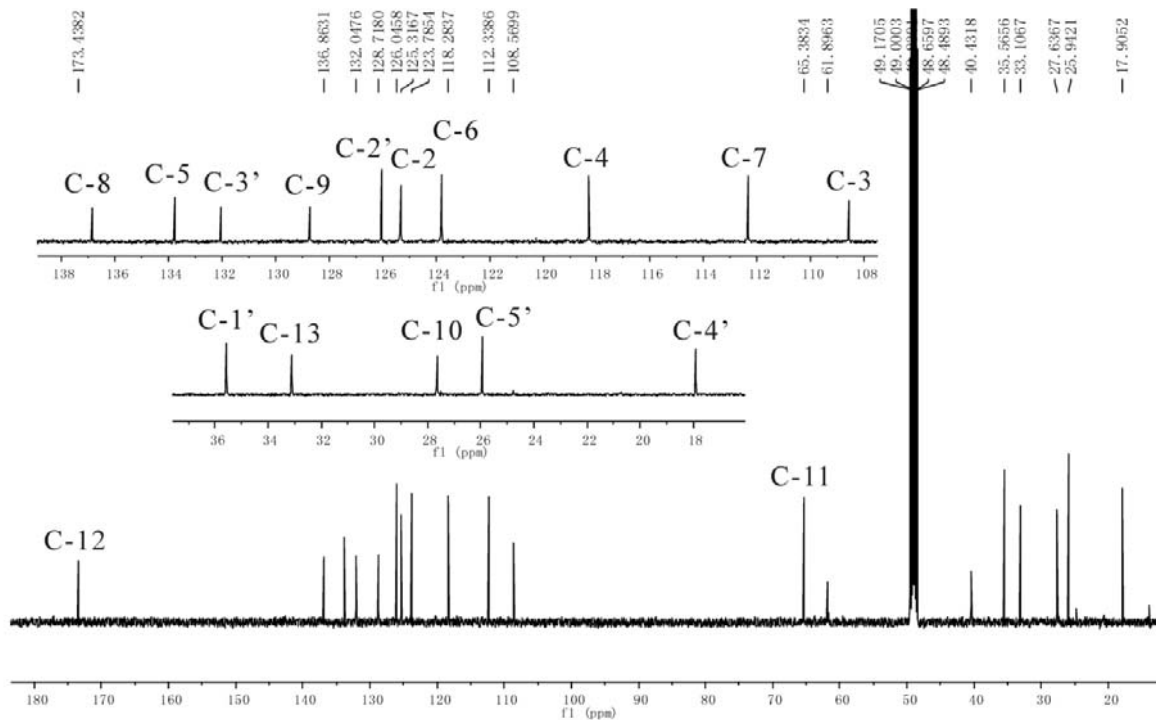

**Figure S9.2.**  $^{13}\text{C-NMR}$  spectrum of **7b** in  $\text{CD}_3\text{OD}$  (500 MHz)

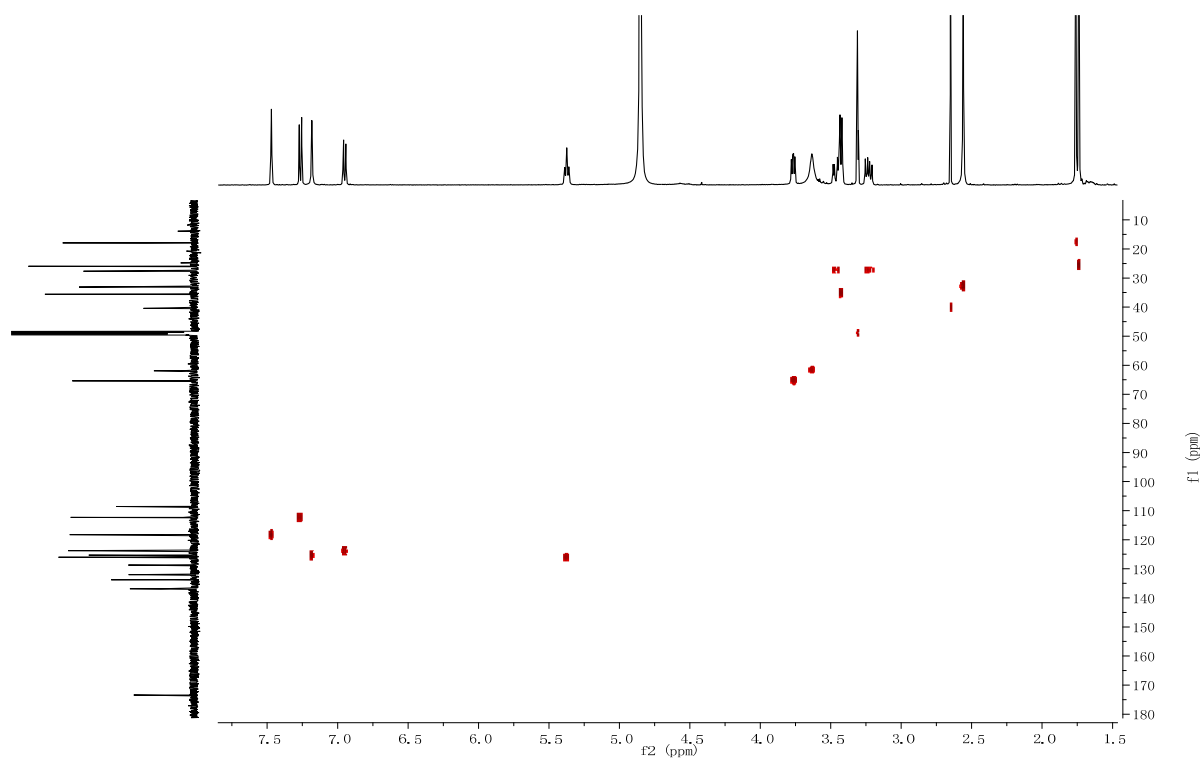

**Figure S9.3.** HSQC spectrum of **7b** in CD<sub>3</sub>OD (500 MHz)

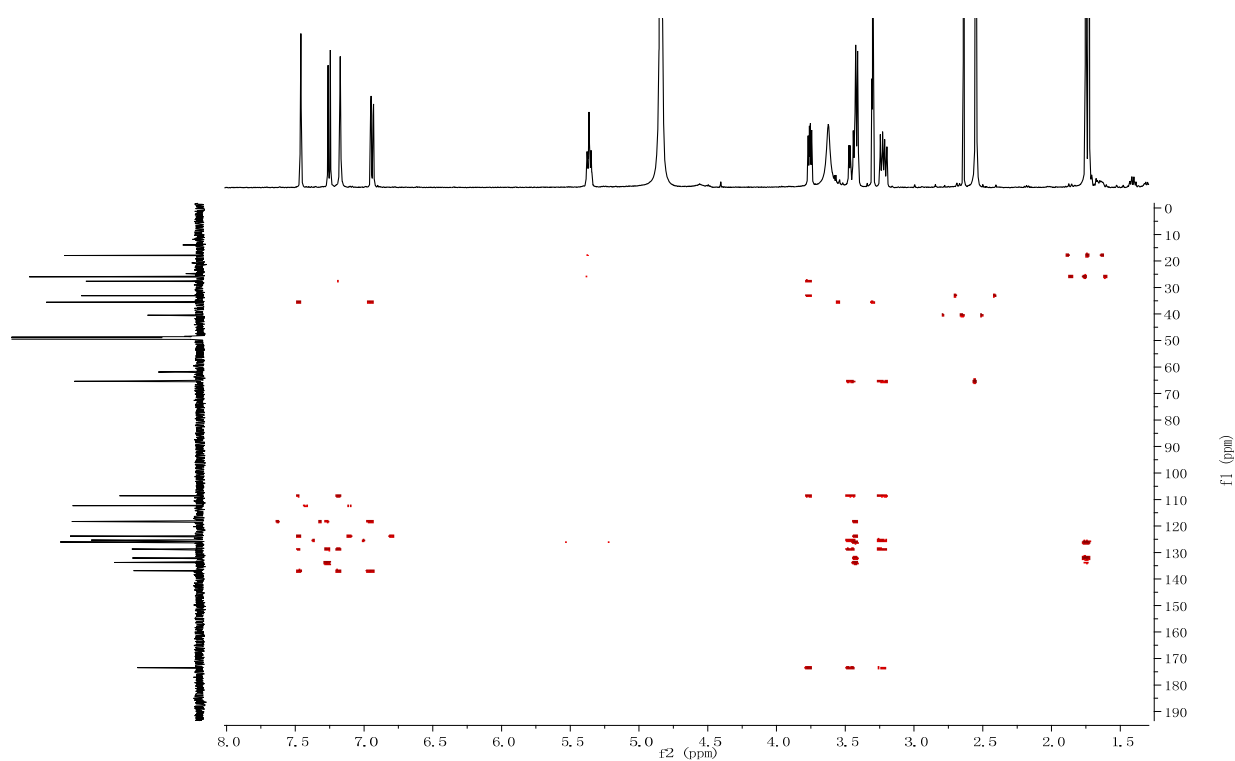

**Figure S9.4.** HMBC spectrum of **7b** in CD<sub>3</sub>OD (500 MHz)

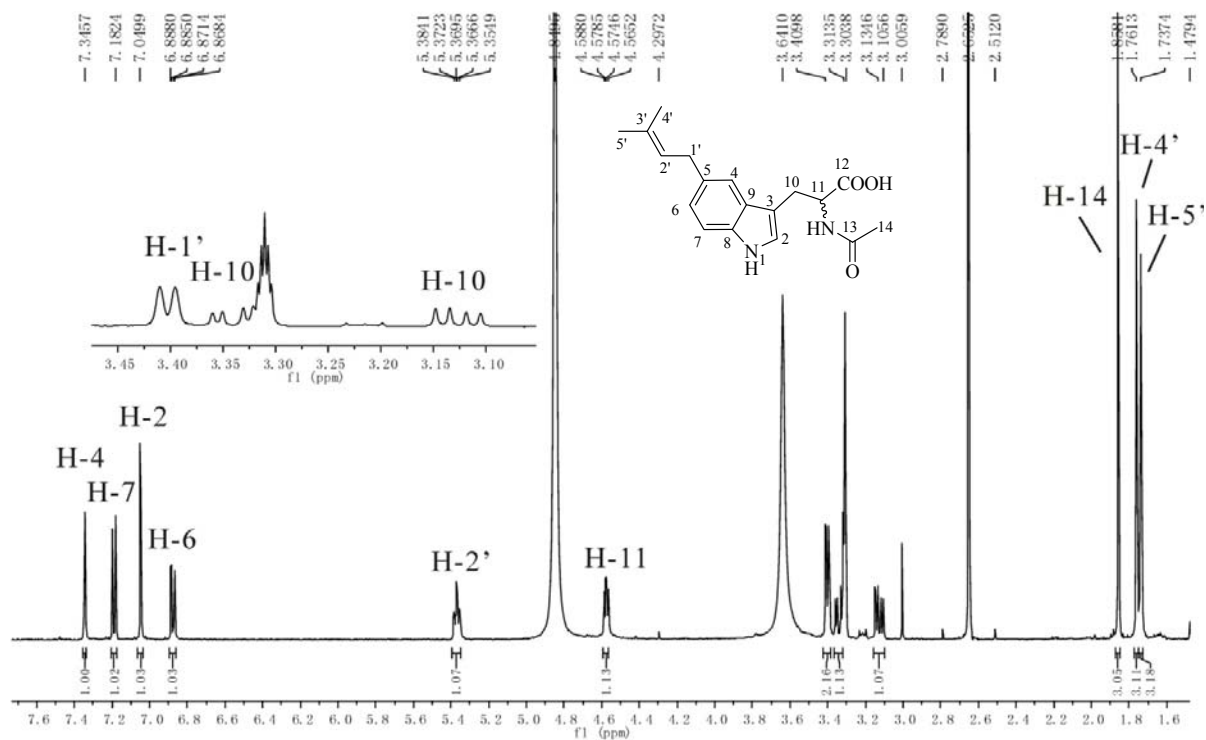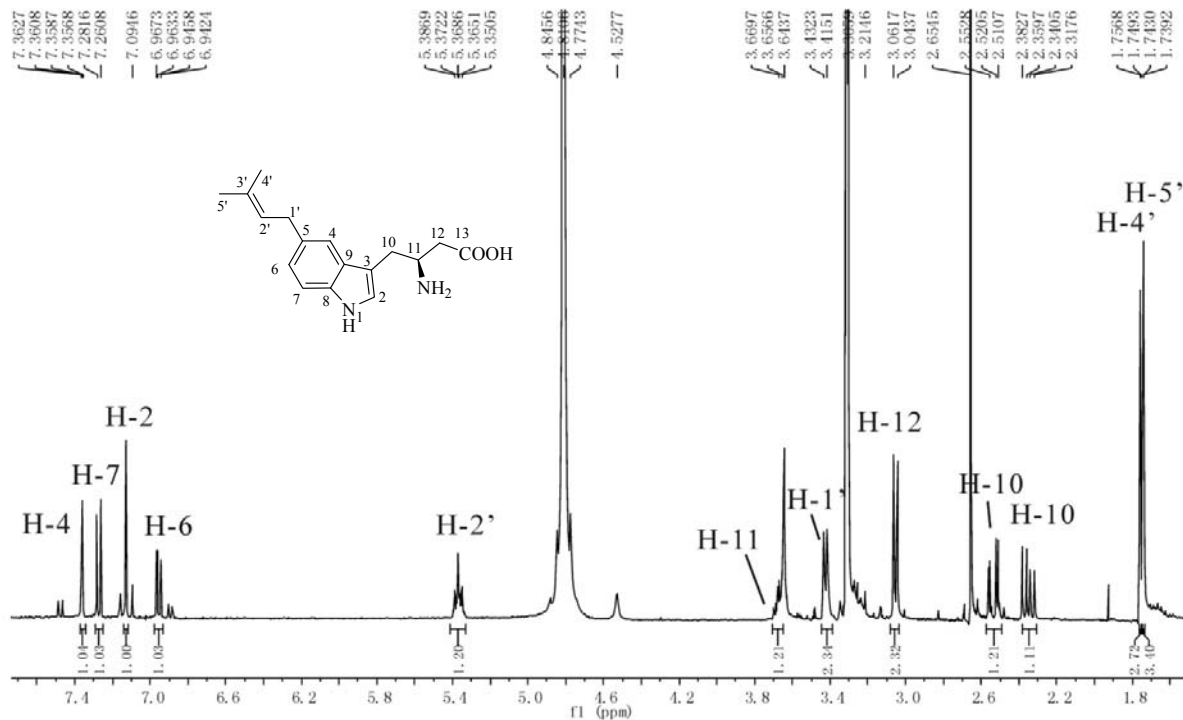



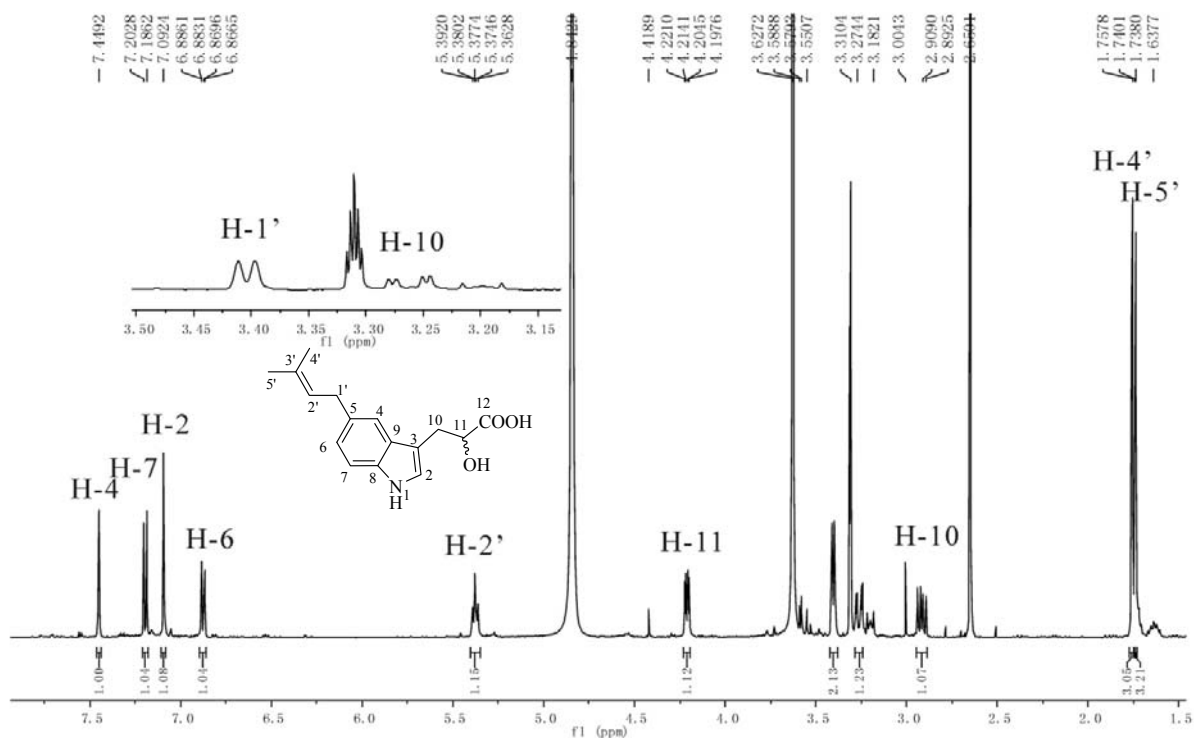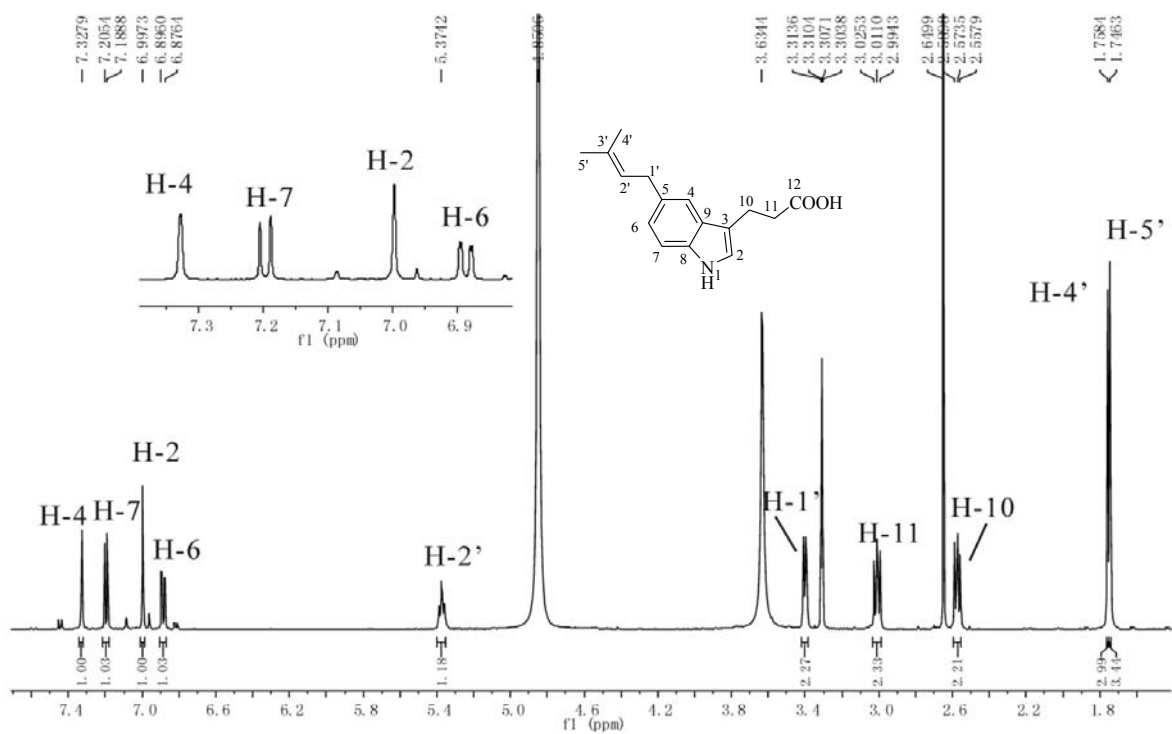

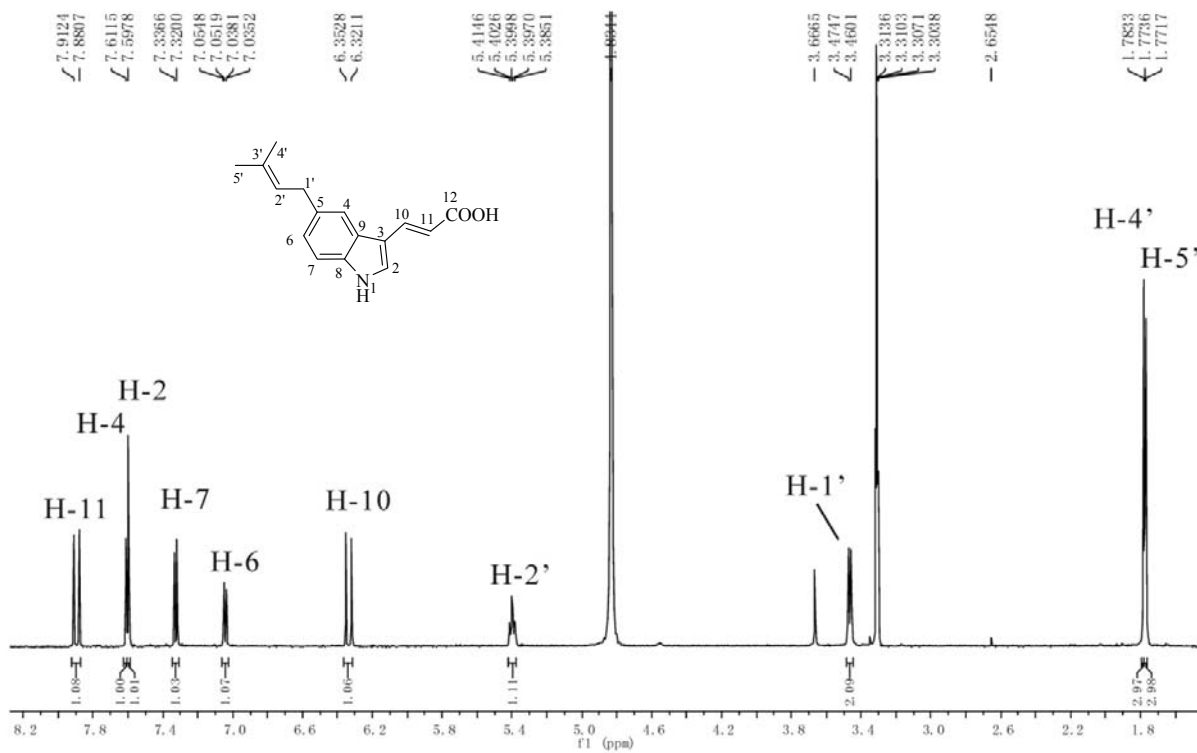

**Figure S14.** <sup>1</sup>H-NMR spectrum of **12b** in CD<sub>3</sub>OD (500 MHz)
